# Automated severe aortic stenosis detection on single-view echocardiography: A multi-center deep learning study

Gregory Holste BA<sup>1,2\*</sup>, Evangelos K. Oikonomou MD DPhil<sup>2\*</sup>, Bobak J. Mortazavi PhD<sup>3,4</sup>,  
Andreas Coppi PhD<sup>2,4</sup>, Kamil F. Faridi MD MSc<sup>2</sup>, Edward J. Miller MD PhD<sup>2</sup>, John K. Forrest  
MD<sup>2</sup>, Robert L. McNamara MD MHS<sup>2</sup>, Lucila Ohno-Machado MD PhD MBA,<sup>5</sup> Neal Yuan  
MD,<sup>6,7</sup> Aakriti Gupta MD MSc,<sup>8</sup> David Ouyang MD,<sup>8,9</sup> Harlan M. Krumholz MD SM<sup>2,4,10</sup>,  
Zhangyang Wang PhD<sup>1</sup>, Rohan Khera MD MS<sup>2,4,10,11</sup>

<sup>1</sup> Department of Electrical and Computer Engineering, The University of Texas at Austin, Austin, TX, USA

<sup>2</sup> Section of Cardiovascular Medicine, Department of Internal Medicine, Yale School of Medicine, New Haven, CT, USA

<sup>3</sup> Department of Computer Science & Engineering, Texas A&M University, College Station, TX, USA

<sup>4</sup> Center for Outcomes Research and Evaluation, Yale-New Haven Hospital, New Haven, CT, USA

<sup>5</sup> Department of Biomedical Informatics, University of California San Diego, La Jolla, CA, USA

<sup>6</sup> Department of Medicine, University of California San Francisco, San Francisco, CA, USA

<sup>7</sup> Division of Cardiology, San Francisco Veterans Affairs Medical Center, San Francisco, CA, USA

<sup>8</sup> Department of Cardiology, Smidt Heart Institute, Cedars-Sinai Medical Center, Los Angeles, CA, USA

<sup>9</sup> Division of Artificial Intelligence in Medicine, Cedars-Sinai Medical Center, Los Angeles, CA, USA

<sup>10</sup> Department of Health Policy and Management, Yale School of Public Health, New Haven, CT

<sup>11</sup> Section of Health Informatics, Department of Biostatistics, Yale School of Public Health, New Haven, CT

\*Contributed equally as co-first authors

**Manuscript type:** Article

**Word count:** 3,885 words

**Display items:** 5 figures, 1 table

**Brief title:** Automated severe aortic stenosis detection

## Address for correspondence:

Rohan Khera, MD, MS

195 Church St, 5<sup>th</sup> Floor, New Haven, CT 06510

203-764-5885;

[rohan.khera@yale.edu](mailto:rohan.khera@yale.edu);

@rohan\_khera

## ABSTRACT

**Background and Aims:** Early diagnosis of aortic stenosis (AS) is critical to prevent morbidity and mortality but requires skilled examination with Doppler imaging. This study reports the development and validation of a novel deep learning model that relies on 2-dimensional parasternal long axis (PLAX) videos from transthoracic echocardiography (TTE) without Doppler imaging to identify severe AS, suitable for point-of-care ultrasonography.

**Methods:** In a training set of 5,257 studies (17,570 videos) from 2016-2020 (Yale-New Haven Hospital [YNHH], Connecticut), an ensemble of 3-dimensional convolutional neural networks was developed to detect severe AS, leveraging self-supervised contrastive pretraining for label-efficient model development. This deep learning model was validated in a temporally distinct set of 2,040 consecutive studies from 2021 from YNHH as well as two geographically distinct cohorts of 5,572 and 865 studies, from California and other hospitals in New England, respectively.

**Results:** The deep learning model achieved an AUROC of 0.978 (95% CI: 0.966, 0.988) for detecting severe AS with 95.4% specificity and 90% sensitivity in the temporally distinct test set, maintaining its diagnostic performance in both geographically distinct cohorts (AUROC 0.972 [95% CI: 0.969, 0.975] in California and 0.915 [95% CI: 0.896, 0.933] in New England, respectively). The model was interpretable with saliency maps identifying the aortic valve as the predictive region. Among non-severe AS cases, predicted probabilities were associated with worse quantitative metrics of AS suggesting association with various stages of AS severity.

**Conclusions:** This study developed and externally validated an automated approach for severe AS detection using single-view 2D echocardiography, with implications for point-of-care screening.

**Keywords:** deep learning, echocardiography, aortic stenosis, digital health

## STRUCTURED GRAPHICAL ABSTRACT

**Key Question:** Is it feasible to automatically screen for the presence of severe aortic stenosis (AS) using single-view echocardiographic videos without the use of Doppler imaging?

**Key Finding:** Using self-supervised pretraining and ensemble learning, we trained a deep learning model to detect severe AS using single-view echocardiography without Doppler imaging. The model maintained its high performance in multiple geographically and temporally distinct cohorts.

**Take-home Message:** We present an automated method to detect severe AS using single-view TTE videos, with implications for point-of-care ultrasound screening as part of routine clinic visits and in limited resource settings by individuals with minimal training.

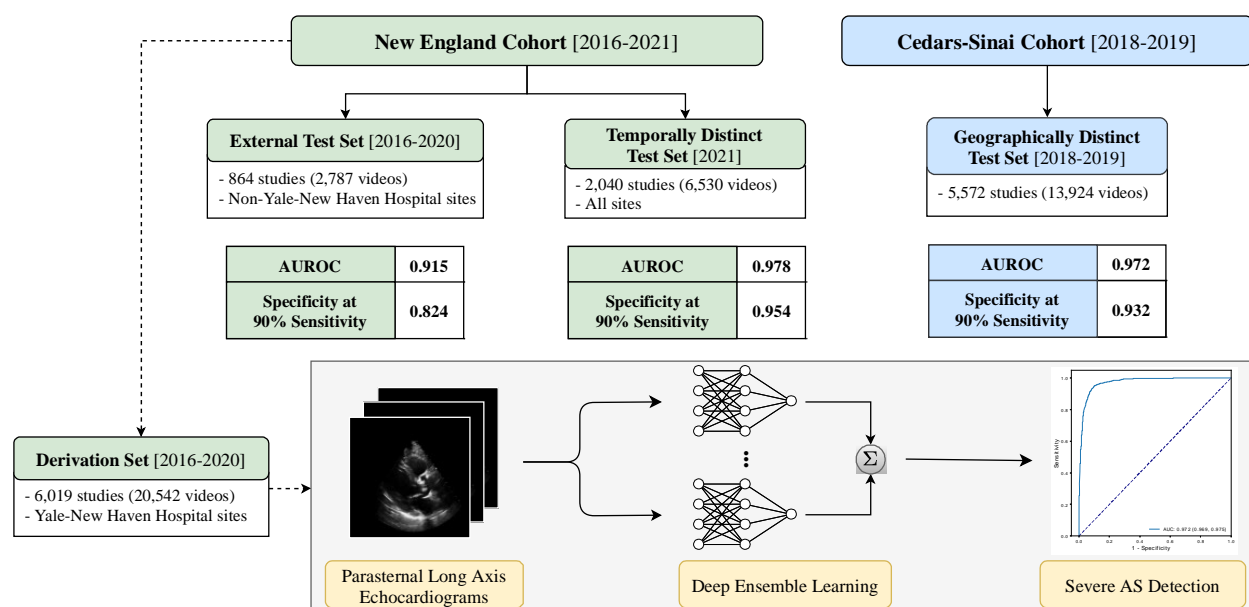

An automated deep learning approach for severe aortic stenosis detection from single-view echocardiography evaluated across geographically and temporally distinct cohorts.

## 1 INTRODUCTION

2 Aortic stenosis (AS) is a chronic, progressive disease, and associated with morbidity and  
3 mortality.<sup>1,2</sup> With advances in both surgical and transcatheter aortic valve replacement,<sup>3</sup> there has  
4 been an increasing focus on early detection and management.<sup>4,5,6</sup> The non-invasive diagnosis of  
5 AS can be made with hemodynamic measurements using Doppler echocardiography,<sup>2,7,8</sup> but that  
6 requires dedicated equipment and skilled acquisition and interpretation. On the other hand, even  
7 though two-dimensional (2D) cardiac ultrasonography is increasingly available with handheld  
8 devices that can visualize the heart,<sup>9</sup> it has not been validated for the diagnosis or longitudinal  
9 monitoring of AS. With an estimated prevalence of 5% among individuals aged 65 years or  
10 older,<sup>8</sup> there is a growing need for user-friendly screening tools which can be used in everyday  
11 practice by people with minimal training to screen for severe AS. This need for timely screening  
12 is further supported by evidence suggesting improved outcomes with early intervention even in  
13 the absence of symptomatic disease.<sup>5</sup>

14 Machine learning offers opportunities to standardize the acquisition and interpretation of  
15 medical images.<sup>10</sup> Deep learning algorithms have successfully been applied in echocardiograms,  
16 where they have shown promise in detecting left ventricular dysfunction,<sup>11</sup> and left ventricular  
17 hypertrophy.<sup>12</sup> With the expanded use of point-of-care ultrasonography,<sup>9</sup> developing user-  
18 friendly screening algorithms relying on single 2D echocardiographic views would provide an  
19 opportunity to improve AS screening by operators with minimal experience through time-  
20 efficient protocols. This is often limited by the lack of carefully curated, labelled datasets, as well  
21 as efficient ways to utilize the often noisy real-world data for model development.<sup>13</sup>

22 In the present study, we hypothesized that a deep learning model trained on 2D  
23 echocardiographic views of parasternal long axis (PLAX) videos can reliably predict the

1 presence of severe AS without requiring Doppler input. The approach leverages self-supervised  
2 learning of PLAX videos along with two other neural network initialization methods to form a  
3 diverse ensemble model capable of identifying severe AS from raw 2D echocardiograms. The  
4 model is trained based on a dataset from different operators and machines, with its external  
5 performance assessed both in geographically and temporally distinct cohorts. Combined with  
6 automated view classification, our approach serves as an end-to-end automated solution for deep  
7 learning applications in the field of point-of-care echocardiography.

8

## 9 **METHODS**

### 10 **Study population & data source**

11 *New England cohort (Yale-New Haven Health network)*: A total of 12,500 studies were queried  
12 from all TTE exams performed between 2016 and 2021 across the Yale New Haven Health  
13 System (YNHHS, including Connecticut and Rhode Island), and were used for model derivation  
14 & testing across different hospitals and time periods. For internal model development and  
15 evaluation, 10,000 studies from 2016-2020 were randomly queried with AS oversampled to  
16 mitigate class imbalance during model training. Specifically, this query sampled normal studies  
17 uniformly (including “no AS” and “sclerosis without stenosis”), oversampled non-severe AS  
18 studies by 5-fold (including “mild AS”, “mild-moderate AS”, “moderate-severe AS”, “low  
19 gradient AS”, and “paradoxical AS”), and oversampled severe AS by 50-fold. This strategy was  
20 designed to ensure that the model encounters sufficient examples of severe AS to learn the  
21 signatures of the disorder. The 10,000 studies were then split at the patient level into a derivation  
22 set (consisting of all patients scanned in the Yale-New Haven Hospital, Connecticut, USA,  
23 including satellite locations) and a geographically distinct, external testing set from New

1 England (consisting of patients scanned at four other hospitals – namely Bridgeport Hospital,  
2 Lawrence & Memorial Hospital, and Greenwich Hospital, all in Connecticut, USA – as well as  
3 the Westerly hospital in Rhode Island, USA). The remaining 2,500 studies of the query were all  
4 conducted across the previously mentioned centers a year later in 2021 with *no oversampling* to  
5 serve as a challenging temporally distinct testing set, where severe AS represents approximately  
6 1% of all cases. The study population is summarized in **Figure 1**.

7  
8 ***Cedars-Sinai cohort:*** For further testing in an additional geographically distinct cohort, all  
9 transthoracic echocardiograms performed at the Cedars-Sinai Medical Center (Los Angeles,  
10 California, USA) between January 1<sup>st</sup> 2018 and December 31<sup>st</sup> 2019 were retrieved. AS severity  
11 was determined from finalized TTE reports. After excluding studies with prosthetic aortic valves,  
12 3,867 TTEs without severe aortic stenosis were sampled at random and combined with 1,705  
13 TTEs with severe AS to create an enriched 5,572-study cohort.

14  
15 ***Consent:*** The study was reviewed by the Yale and Cedars-Sinai Institutional Review Boards,  
16 which approved the study protocol and waived the need for informed consent as the study  
17 represents secondary analysis of existing data.

18  
19 ***Echocardiogram interpretation:*** All studies were performed by trained echocardiographers or  
20 cardiologists and reported by board-certified cardiologists with specific training cardiac  
21 echocardiography. These reports were a part of routine clinical care, in accordance with the  
22 recommendations of the American Society of Echocardiography (ASE).<sup>14,15</sup> The presence of AS

1 severity was adjudicated based on the original echocardiographic report. Further details on the  
2 measurements obtained are presented in the **Supplement**.

3

#### 4 **Model training & development**

5 **Data pre-processing:** All studies underwent de-identification, view classification, and  
6 preprocessing to curate a dataset of PLAX videos for deep-learned severe AS prediction. The full  
7 process describing the extraction of the echocardiographic videos, loading of image data,  
8 masking of identifying information, conversion to Audio Video Interleave format (AVI), and  
9 downsampling for further processing and automated view classification are described in the  
10 **Supplement**. Briefly, after excluding studies that were not properly extracted or contained no  
11 pixel data, 9,710 studies with 447,653 videos underwent automated view classification based on  
12 a pretrained TTE view classifier.<sup>16</sup> We retained videos where the automated view classifier most  
13 confidently predicted the presence of a PLAX view. After excluding cases of low-flow, low-  
14 gradient, and paradoxical AS (determined based on the final clinical report), the final Yale-New  
15 Haven Health system dataset consisted of 30,136 videos in 9,173 studies. This included 2,040  
16 studies from 2021, which were set aside to form a temporally distinct testing set, while the  
17 remaining 7,082 studies (with AS oversampled as described above) were split into a derivation  
18 set (Yale-New Haven Hospital and satellite centers) and a geographically distinct testing set (see  
19 *Study population & data source*, **Figure 1**). To ensure no patient overlap between derivation and  
20 testing sets, 199 studies corresponding to patients in the derivation set were not included in the  
21 testing set. Finally, the derivation set was randomly split into training and validation sets at an  
22 85%/15% ratio, leaving 5,257 studies for training, 928 studies for internal validation during  
23 training, and 864 studies for external validation.



1  
2 ***Self-supervised learning (SSL)***: We used our previously described novel approach of self-  
3 supervised contrastive pretraining for echocardiogram videos.<sup>17</sup> This approach demonstrated that  
4 classification tasks could be performed in a more data-efficient manner through “in-domain”  
5 pretraining on echocardiograms,<sup>17</sup> as opposed to other standard approaches such as random  
6 initialization of weights and transfer learning.<sup>11,18,19</sup> Briefly, this self-supervised learning was  
7 performed on the training set videos with a novel combination of (i) a multi-instance contrastive  
8 learning task and (ii) a frame re-ordering pretext task, both explained in detail in the **Supplement**  
9 and summarized in **Figure 2**. For this, we adopted “multi-instance” contrastive learning, where  
10 the model was trained to learn similar representations of *different* videos from the *same* patient,  
11 which allowed the model to learn the latent space of PLAX-view echocardiographic videos. To  
12 additionally encourage temporal coherence of our model, we included a frame re-ordering  
13 “pretext” task to our self-supervised learning method, where we randomly permuted the frames  
14 of each input echo, then trained the model to predict the original order of frames.<sup>22</sup>

15 Self-supervised pretraining was performed on randomly sampled video clips of 4  
16 consecutive frames from each of the training set echocardiogram videos for 300 epochs. A 3D-  
17 ResNet18<sup>23</sup> architecture was used as the encoder (see the **Supplement** for full architecture  
18 details). The model was trained for 300 epochs on all unique pairs of different PLAX videos  
19 from the same patient with the Adam optimizer,<sup>24</sup> a learning rate of 0.1, a batch size of 392 (196  
20 per GPU), and NT-Xent temperature hyperparameter of 0.5. The following augmentations were  
21 applied to each frame in a temporally consistent manner (same transformations for each frame of  
22 a given video clip): random zero padding by up to 8 pixels in each spatial dimension, a random

1 horizontal flip with probability 0.5, and a random rotation within -10 and 10 degrees with  
2 probability 0.5.

3  
4 ***Deep neural network training for severe AS prediction:*** The 3D-ResNet18 architecture  
5 described above was also leveraged to detect severe AS. Three different methods were used to  
6 initialize the parameters of this network: an SSL initialization, a Kinetics-400 initialization, and a  
7 random initialization (see **Supplement**, and **Figure 2**). All fine-tuning models were trained on  
8 randomly sampled video clips of 16 consecutive frames from training set echocardiograms.  
9 Models were trained for a maximum of 30 epochs with early stopping if validation AUROC did  
10 not improve for 5 consecutive epochs. Severe AS models were trained on a single NVIDIA RTX  
11 3090 GPU with the Adam optimizer, a learning rate of  $1 \times 10^{-4}$  (except the SSL-pretrained  
12 model, which used a learning rate of 0.1) and a batch size of 88 using a sigmoid cross-entropy  
13 loss. We additionally used class weights computed with the method provided by *scikit-learn*<sup>25</sup> to  
14 accommodate class imbalance in addition to label smoothing<sup>26,27</sup> with  $\alpha=0.1$ , a method to  
15 improve model calibration and generalization. Learning curves depicting loss throughout training  
16 can be found in **Figure S1**.

17  
18 ***Ensemble learning:*** Since models were trained on 16-frame video clips, we averaged clip-level  
19 predictions to obtain video-level predictions of severe AS. After repeating the process for all  
20 videos, severe AS probabilities for all videos were then averaged to obtain study-level AS  
21 predictions. The final ensemble model is then formed by averaging the study-level output  
22 probabilities of the SSL-pretrained model, the Kinetics-400-pretrained model, and the randomly  
23 initialized model after fine-tuning each ensemble member to detect severe AS. Since no quality

1 control is applied when selecting PLAX videos for this work, averaging results over multiple  
2 videos in the same study has a stabilizing effect that boosts predictive performance.<sup>28</sup>

3  
4 ***Assessing diagnostic performance in the testing sets:*** We evaluate the model’s performance on  
5 both area under the receiver operating characteristic curve (AUROC) and the area under the  
6 precision-recall curve (AUPRC), with the latter being specifically informative when class  
7 imbalance is present.<sup>29</sup> We additionally reported metrics that assess performance at specific  
8 decision thresholds such as F1 score, positive predictive value (PPV), specificity at 90%  
9 sensitivity, and PPV at 90% sensitivity. For these metrics, we proceed with the threshold that  
10 maximizes F1 score, the harmonic mean of precision and recall, on the given evaluation set. The  
11 latter two metrics – specificity and PPV at 90% sensitivity – were included to provide a clinically  
12 relevant assessment of the model’s performance at the minimum sensitivity required for real-  
13 world deployment.

14  
15 ***Model explainability:*** We evaluated the predictive focus of the models using saliency maps.  
16 These were generated using the Grad-CAM method<sup>30</sup> for obtaining visual explanations from  
17 deep neural networks (see **Supplement**). This method was used to produce a frame-by-frame  
18 “visual explanation” of where the model is focusing to make its prediction. To generate a single  
19 2-dimensional heatmap for a given echo clip, the pixelwise maximum along the temporal axis  
20 was taken to capture the most salient regions for severe AS predictions across all timepoints.  
21 These spatial attention maps were visualized based on the randomly initialized, Kinetics-400-  
22 pretrained, and SSL-pretrained AS models for five true positives, a true negative, and a false  
23 positive.

1

## 2 **Statistical analysis**

3 All 95% confidence intervals for model performance metrics were computed by bootstrapping.  
4 Specifically, 10,000 bootstrap samples (samples with replacement having equal sample size to  
5 the original evaluation set) of the evaluation set were drawn, metrics were computed on this set  
6 of studies, and nonparametric confidence intervals were constructed with the percentile method.  
7 Bootstrapping was performed at the study level since the severe AS labels are provided for each  
8 echocardiographic study. For analysis of correlation between model outputs and quantitative  
9 measures of AS, categorical variables were summarized as percentages, whereas continuous  
10 variables are reported as mean values with standard deviation and visualized using violin plots.  
11 Continuous variables between two groups were compared using the Student's *t*-test. Pearson's *r*  
12 was used to assess the pairwise correlation between continuous variables. Spearman's rank-order  
13 correlation test was used to analyze the relationship between model outputs and AS severity,  
14 which was represented ordinally (0=none, 1=mild-moderate, 2=severe). All statistical tests were  
15 two-sided with a significance level of 0.05, unless specified otherwise. Analyses were performed  
16 using Python (version 3.8.5).

17

## 18 **RESULTS**

### 19 **Study Population**

20 In the New England cohort, after removing studies with no pixel data, de-identifying video  
21 frames, and using an automated view classifier to determine the PLAX view, our final derivation  
22 set consisted of 6,019 studies with 20,542 videos (1,294,197 frames) (mean age  $69.6 \pm 15.7$   
23 years,  $n=2,992$  [48.4%] women), with mild, moderate, and severe AS in 13.8% ( $n=780$ ), 8.8%

1 (n=495), and 19.2% (n=1,588) of studies, respectively. To evaluate generalization across local  
2 hospital sites, we curated a test set of 864 studies (2,787 videos) from separate New England  
3 hospitals in the YNHHS network that were not present in the derivation set. The temporally  
4 distinct test set consisted of 2,040 randomly selected scans with a total of 6,530 videos  
5 performed between January 1<sup>st</sup> 2021 and December 15<sup>th</sup> 2021 across YNHHS (mean age  $65.7 \pm$   
6  $16.4$  years, n=997 (48.9%) women) were used for time-dependent model validation. This  
7 temporally distinct set was *not* oversampled, with mild, moderate, and severe AS estimated in  
8 4.1% (n=83), 2.9% (n=59), and 1.0% (n=20) of the studies, respectively. Finally, a set of 5,572  
9 studies performed at the Cedars-Sinai Medical Center between 2018 and 2019, with  
10 oversampling for severe AS (1,705 studies with severe AS out of 5,572, 30.6%) (mean age  $68.5$   
11  $\pm 17.1$  years, n=2,370 [42.5%] women), was also used for further external testing (**Figure 1**).  
12 Further information on patient characteristics is presented in the **Methods** and **Table 1**.

13

#### 14 **Performance of a deep learning model for severe AS detection based on PLAX videos**

15 The ensemble model was able to reliably detect the presence of severe AS using single-view,  
16 two-dimensional PLAX videos, demonstrating an AUROC of 0.915 (95% CI: 0.896, 0.933) and  
17 82.4% sensitivity at 90% specificity (95% CI: 72.5%, 85.7%) on the geographically distinct  
18 testing set of New England hospitals not included in the derivation set. The model also  
19 demonstrated consistent performance across time in the same hospital system, maintaining its  
20 discriminatory performance with an AUROC of 0.978 (95% CI: 0.966, 0.988) and 95.4%  
21 sensitivity at 90% specificity (95% CI: 88.0%, 97.1%) on the temporally distinct testing set from  
22 2021. Finally, in further geographically distinct testing using scans performed at Cedars-Sinai,  
23 the model generalized well across institutions, reaching 0.972 AUROC (95% CI: 0.969, 0.975)

1 and 93.2% specificity at 90% sensitivity (95% CI: 92.4%, 94.0%). Since the prevalence of severe  
2 AS varied among the external testing populations, the AUPR varied from 0.414 (95% CI: 0.231,  
3 0.594) in the temporally distinct test set (New England, 2021) to 0.932 (95% CI: 0.921, 0.941) in  
4 the external testing set from Cedars-Sinai. Receiver operating characteristic (ROC) and  
5 precision-recall (PR) curves, as well as the distribution of model probabilities across disease  
6 groups (no AS, mild-moderate AS, severe AS) showing a graded relationship across severity  
7 groups, are shown in **Figure 3**; see **Supplemental Table S1** for full detailed results. Furthermore,  
8 in sensitivity analyses without averaging predictions from multiple videos in the same study we  
9 observed overall consistent results, as summarized in **Supplemental Table S2**.

10

### 11 **Explainable predictions through saliency maps**

12 We used Gradient-weighted Class Activation Mapping (Grad-CAM) to identify the regions in  
13 each video frame that contributed the most to the predicted label. In the examples shown in  
14 **Figure 4**, the first five columns represent the five most confident severe AS predictions, the sixth  
15 column represents the most confident “normal” (no severe AS) prediction, and the seventh  
16 column represents the most confident incorrect severe AS prediction. The saliency maps from  
17 our SSL approach demonstrated overall consistent and specific localization of the activation  
18 signal in the pixels corresponding to the aortic valve and annulus (bottom row).

19

### 20 **Model identification of features of AS severity**

21 In the temporally distinct testing set from 2021 (reflecting the normal prevalence of severe AS in  
22 an echocardiographic cohort), we observed that the predictions of the ensemble model correlated  
23 with continuous metrics of AS severity, including the peak aortic valve velocity ( $r=0.59$ ,

1 P<0.001), trans-valvular mean gradient ( $r=0.66$ ,  $P<0.001$ ) and the mean aortic valve area ( $r=-$   
2  $0.53$ ,  $P<0.001$ ). On the other hand, the model predictions were independent of the left ventricular  
3 ejection fraction (LVEF) ( $r=-0.02$ ,  $P=0.37$ ), a negative control. In further sensitivity analysis, we  
4 stratified cases without AS or mild/moderate AS based on the predictions of our model as true  
5 negatives (TN) or false positives (FP). Compared to true negatives, false positive cases had  
6 significantly higher peak aortic velocities (FP: 3.4 [25<sup>th</sup>-75<sup>th</sup> percentile: 2.9-3.7] m/sec; TN: 1.6  
7 [1.3-2.3] m/sec,  $P<0.001$ ), trans-valvular mean gradients (FP: 26.0 [25<sup>th</sup>-75<sup>th</sup> percentile: 20.5-  
8 31.8] mmHg; TN: 5.0 [3.8-9.0] m/sec,  $P<0.001$ ), and mean aortic valve area (FP: 1.04 [25<sup>th</sup>-75<sup>th</sup>  
9 percentile: 0.86-1.28] cm<sup>2</sup>; TN: 1.99 [1.49-2.67] cm<sup>2</sup>,  $P<0.001$ ), but no significant difference in  
10 the LVEF (FP: 65.4% [55.0%-67.8%]; TN: 60.0% [55.0-65.0%],  $P=0.19$ ) (**Figure 5**).

11

## 12 **DISCUSSION**

13 We have developed and validated an automated algorithm that can efficiently screen for and  
14 detect the presence of severe AS based on a single-view two-dimensional transthoracic  
15 echocardiographic video. The algorithm demonstrates excellent performance (AUROC of 0.91 to  
16 0.97), with high sensitivity (>93%) at high specificity (90%), maintaining its robustness and  
17 discriminatory performance across several geographically and temporally distinct cohorts with  
18 varying prevalence of severe AS. We also present a novel self-supervised step leveraging multi-  
19 instance contrastive learning, which allowed our algorithm to learn key representations that  
20 define each patient's unique phenotype through contrastive pre-training, independent of the  
21 expected technical variation in image acquisition, including differences in probe orientation,  
22 beam angulation and depth. Visualization of saliency maps introduces explainability to our  
23 algorithms and confirms the key areas of the PLAX view, including the aortic valve and annulus,

1 that contributed the most to our predictions. Furthermore, features learned by the model  
2 generalize to lower severity cases, highlighting the potential value of our model in the  
3 longitudinal monitoring of AS, a disease with a well-defined, progressive course.<sup>2</sup> Our approach  
4 has the potential to expand the use of echocardiographic screening for suspected AS, shifting the  
5 burden away from dedicated echocardiographic laboratories to point-of-care screening in  
6 primary care offices, or low-resource settings. It may also enable operators with minimal  
7 echocardiographic experience to screen for the condition by obtaining simple two-dimension  
8 PLAX views without the need for comprehensive Doppler assessment, which can then be  
9 reserved for confirmatory assessment.

10 In the recent years a number of artificial intelligence applications have been described in  
11 the field of echocardiography,<sup>31</sup> ranging from automated classification of echocardiographic  
12 views,<sup>32</sup> video-based beat-to-beat assessment of left ventricular systolic dysfunction,<sup>11</sup> detection  
13 of left ventricular hypertrophy and its various subtypes,<sup>12</sup> diastolic dysfunction,<sup>33</sup> to expert-level  
14 prenatal detection of complex congenital heart disease.<sup>34</sup> Of note, machine learning methods  
15 further enable individuals without prior ultrasonography experience to obtain diagnostic TTE  
16 studies for limited diagnostic use.<sup>35</sup> Despite this and even though the diagnosis and grading of  
17 AS remains dependent on echocardiography,<sup>2,14</sup> most artificial intelligence solutions for timely  
18 AS screening have focused on alternative data types, such as audio files of cardiac auscultation,<sup>36</sup>  
19 12-lead electrocardiograms,<sup>37-39</sup> cardio-mechanical signals using non-invasive wearable inertial  
20 sensors,<sup>40</sup> as well as chest radiographs.<sup>41</sup> For 12-lead electrocardiograms, AUC were consistently  
21  $<0.90$ ,<sup>37-39</sup> whereas for alternative data types, analyses were limited to small datasets without  
22 external validation.<sup>36,40</sup> Other studies have explored the value of structured data derived from  
23 comprehensive TTE studies in defining phenotypes with varying disease trajectories.<sup>42</sup> More



1 recently the focus has shifted to AI-assisted AS detection through automated TTE interpretation.  
2 In a recent study, investigators employed a form of self-supervised learning to automate the  
3 detection of AS, with their method however discarding temporal information by only including  
4 the first frame of each video loop, while also relying on the acquisition of images from several  
5 different views.<sup>43</sup> The approach that relies on ultrasonography is also safer than the alternative  
6 screening strategies, such as those using chest computed tomography and aortic valve calcium  
7 scoring,<sup>42,44</sup> which expose patients to radiation.

8 In this context, our work represents an advance both in the clinical and methodological  
9 space. First, we describe a method that can efficiently screen for a condition associated with  
10 significant morbidity and mortality,<sup>2,7</sup> with increasing prevalence in the setting of an aging  
11 population.<sup>45</sup> Our method has the potential to shift the initial burden away from trained  
12 echocardiographers and specialized core laboratories, as part of a more cost-effective screening  
13 and diagnostic cascade that can detect the condition at its earliest stages.<sup>9,35</sup> In this regard, major  
14 strengths of our model include its reliance on a single echocardiographic view that can be  
15 obtained by individuals with limited experience and minimal training,<sup>35</sup> and its ability to process  
16 temporal information through analysis of videos rather than isolated frames. The overarching  
17 goal is to develop screening tools that can be deployed in a cost-effective manner, gatekeeping  
18 access to comprehensive TTE assessment, which can be used as a confirmatory test to establish  
19 the suspected diagnosis.

20 Second, our work describes an end-to-end framework to boost artificial intelligence  
21 applications in echocardiography. We present an algorithm that automatically detects  
22 echocardiographic views, then performs self-supervised representation learning of PLAX videos  
23 with a multi-instance, contrastive learning approach. This novel approach further enables our

1 algorithm to learn key representations of a patient’s cardiac phenotype that generalize and  
2 remain consistent across different clips and variations of the same echocardiographic views. By  
3 optimizing the detection of an echocardiographic fingerprint for each patient, this important  
4 pretraining step has the potential to boost AI-based echocardiographic assessment across a range  
5 of conditions. Furthermore, unlike previous approaches,<sup>43</sup> our method benefits from multi-  
6 instance contrastive learning, which learns key representations using different videos from the  
7 same patient, a method that has been shown to improve predictive performance in the  
8 classification of dermatology images.<sup>21</sup>

9 Further to detecting severe AS, our algorithm learns features of aortic valvular pathology  
10 that generalize across different stages of the condition. Saliency maps demonstrate that the model  
11 focuses on the aortic valve with notable variation throughout the cardiac cycle, possibly learning  
12 features such as aortic valve calcification and restricted leaflet mobility.<sup>14</sup> When restricting our  
13 analysis to patients without severe AS, the model’s predictions strongly correlated with Doppler-  
14 derived, quantitative features of stenosis severity. This is in accordance with the known natural  
15 history of AS, a progressive, degenerative condition, the hallmarks of which are aortic valve  
16 calcification, restricted mobility, functional stenosis and eventual ventricular decompensation.<sup>2,7</sup>  
17 As such, our algorithm’s predictions also carry significant value as quantitative predictors of the  
18 stage of AV severity and could theoretically be used to monitor the rate of AS progression.

19 Limitations of our study include the lack of prospective validation of our findings. To this  
20 end, we are working on deploying this method in a prospective cohort of patients referred for  
21 routine TTE assessment to understand its real-world implications as a screening tool. Second,  
22 our model is limited to the use of PLAX views, which often represent the first step of TTE or  
23 POCUS protocols in cardiovascular assessment. Though there is no technical restriction to

1 expanding these methods to alternative views, increasing the complexity of the screening  
2 protocol is likely to negatively impact its adoption in busy clinical settings. Finally, this study  
3 used data from formal TTEs, which generally produce higher-quality images than machines in  
4 POCUS settings. Though videos were downsampled for model development, further validation is  
5 needed to ensure robustness across acquisition technologies.

6

## 7 **CONCLUSION**

8 In summary, we propose an efficient method to screen for severe AS using single-view (PLAX)  
9 TTE videos without the need for Doppler signals. More importantly, we describe an end-to-end  
10 approach for the deployment of artificial intelligence solutions in echocardiography, starting  
11 from automated view classification to self-supervised representation learning to accurate and  
12 explainable detection of severe AS. Our findings have significant implications for point-of-care  
13 ultrasound screening of AS as part of routine clinic visits and in limited resource settings and for  
14 individuals with minimal training.

15

## 16 **FUNDING**

17 The study was supported by the National Heart, Lung, and Blood Institute of the National  
18 Institutes of Health (under award K23HL153775 to R.K.).

19

## 20 **CONFLICTS OF INTEREST**

21 E.K.O is a co-inventor of the U.S. Provisional Patent Application 63/177,117, a co-founder of  
22 Evidence2Health, and reports a consultancy and stock option agreement with Caristo Diagnostics  
23 Ltd (Oxford, U.K.), all unrelated to the current work. B.J.M. reported receiving grants from the

1 National Institute of Biomedical Imaging and Bioengineering, National Heart, Lung, and Blood  
2 Institute, US Food and Drug Administration, and the US Department of Defense Advanced  
3 Research Projects Agency outside the submitted work. In addition, B.J.M. has a pending patent  
4 on predictive models using electronic health records (US20180315507A1). A.H.R. is supported  
5 in part by CNPq (310679/2016-8 and 465518/2014-1) and FAPEMIG (PPM-00428-17 and RED-  
6 00081-16) and is funded by Kjell och Märta Beijer Foundation. J.K.F. has received grant  
7 support/research contracts and consultant fees/honoraria/Speakers Bureau fees from Edwards  
8 Lifesciences and Medtronic. H.M.K. works under contract with the Centers for Medicare &  
9 Medicaid Services to support quality measurement programs, was a recipient of a research grant  
10 from Johnson & Johnson, through Yale University, to support clinical trial data sharing; was a  
11 recipient of a research agreement, through Yale University, from the Shenzhen Center for Health  
12 Information for work to advance intelligent disease prevention and health promotion;  
13 collaborates with the National Center for Cardiovascular Diseases in Beijing; receives payment  
14 from the Arnold & Porter Law Firm for work related to the Sanofi clopidogrel litigation, from  
15 the Martin Baughman Law Firm for work related to the Cook Celect IVC filter litigation, and  
16 from the Siegfried and Jensen Law Firm for work related to Vioxx litigation; chairs a Cardiac  
17 Scientific Advisory Board for UnitedHealth; was a member of the IBM Watson Health Life  
18 Sciences Board; is a member of the Advisory Board for Element Science, the Advisory Board for  
19 Facebook, and the Physician Advisory Board for Aetna; and is the co-founder of Hugo Health, a  
20 personal health information platform, and co-founder of Refactor Health, a healthcare AI-  
21 augmented data management company. D.O. is supported by NIH K99 HL157421-01 and has  
22 provisional patents in AI and echocardiography. R.K. received support from the National Heart,  
23 Lung, and Blood Institute of the National Institutes of Health (under award K23HL153775) and

1 the Doris Duke Charitable Foundation (under award, 2022060). R.K. further receives research  
2 support, through Yale, from Bristol-Myers Squibb. He is also a coinventor of U.S. Pending  
3 Patent Applications. 63/177,117, and 63/346,610, unrelated to the current work. He is also a  
4 founder of Evidence2Health, a precision health platform to improve evidence-based  
5 cardiovascular care. The remaining authors have no competing interests to disclose.

6

## 7 **DATA AVAILABILITY**

8 The data are not available for public sharing given the restrictions in our institutional review  
9 board approval. The deidentified test set may be available to researchers under a data use  
10 agreement after the study has been published in a peer-reviewed journal.

11

## 12 **CODE AVAILABILITY**

13 The code repository for this work can be found at [https://github.com/CarDS-Yale/echo-severe-](https://github.com/CarDS-Yale/echo-severe-AS)  
14 [AS](#).

15

## 16 **AUTHOR CONTRIBUTIONS**

17 G.H. and E.K.O. performed the analyses, G.H., E.K.O. and R.K. drafted the manuscript, and all  
18 other authors provided critical revisions. A.C., N.Y., A.G., and D.O. facilitated cross-institution  
19 validation on data from Cedars-Sinai Hospital. R.K. supervised the study and is the guarantor.

20

## 21 **REFERENCES**

- 22 1. Eugène Marc, Duchnowski Piotr, Prendergast Bernard, et al. Contemporary Management of Severe  
23 Symptomatic Aortic Stenosis. *J Am Coll Cardiol* 2021; 78: 2131–2143.
- 24 2. Otto CM, Prendergast B. Aortic-valve stenosis--from patients at risk to severe valve obstruction. *N*  
25 *Engl J Med* 2014; 371: 744–756.

- 1 3. Smith CR, Leon MB, Mack MJ, et al. Transcatheter versus surgical aortic-valve replacement in  
2 high-risk patients. *N Engl J Med* 2011; 364: 2187–2198.
- 3 4. Reardon MJ, Van Mieghem NM, Popma JJ, et al. Surgical or Transcatheter Aortic-Valve  
4 Replacement in Intermediate-Risk Patients. *N Engl J Med* 2017; 376: 1321–1331.
- 5 5. Kang D-H, Park S-J, Lee S-A, et al. Early Surgery or Conservative Care for Asymptomatic Aortic  
6 Stenosis. *N Engl J Med* 2020; 382: 111–119.
- 7 6. The Early Valve Replacement in Severe Asymptomatic Aortic Stenosis Study,  
8 <https://clinicaltrials.gov/ct2/show/NCT04204915> (accessed June 2, 2022).
- 9 7. Otto CM, Nishimura RA, Bonow RO, et al. 2020 ACC/AHA Guideline for the Management of  
10 Patients With Valvular Heart Disease: A Report of the American College of Cardiology/American  
11 Heart Association Joint Committee on Clinical Practice Guidelines. *Circulation* 2021; 143: e72–  
12 e227.
- 13 8. Baumgartner H, Falk V, Bax JJ, et al. 2017 ESC/EACTS Guidelines for the management of valvular  
14 heart disease. *Eur Heart J* 2017; 38: 2739–2791.
- 15 9. Narula J, Chandrashekar Y, Braunwald E. Time to Add a Fifth Pillar to Bedside Physical  
16 Examination: Inspection, Palpation, Percussion, Auscultation, and Insonation. *JAMA Cardiol* 2018;  
17 3: 346–350.
- 18 10. Dey D, Slomka PJ, Leeson P, et al. Artificial intelligence in cardiovascular imaging: JACC state-of-  
19 the-art review. *J Am Coll Cardiol* 2019; 73: 1317–1335.
- 20 11. Ouyang D, He B, Ghorbani A, et al. Video-based AI for beat-to-beat assessment of cardiac function.  
21 *Nature* 2020; 580: 252–256.
- 22 12. Duffy G, Cheng PP, Yuan N, et al. High-Throughput Precision Phenotyping of Left Ventricular  
23 Hypertrophy With Cardiovascular Deep Learning. *JAMA Cardiol* 2022; 7: 386–395.
- 24 13. Newgard CD, Lewis RJ. Missing data: How to best account for what is not known. *JAMA: the  
25 journal of the American Medical Association* 2015; 314: 940–941.
- 26 14. Baumgartner H, Hung J, Bermejo J, et al. Echocardiographic assessment of valve stenosis:  
27 EAE/ASE recommendations for clinical practice. *J Am Soc Echocardiogr* 2009; 22: 1–23; quiz 101–  
28 2.
- 29 15. Mitchell C, Rahko PS, Blauwet LA, et al. Guidelines for performing a comprehensive transthoracic  
30 echocardiographic examination in adults: Recommendations from the American society of  
31 echocardiography. *J Am Soc Echocardiogr* 2019; 32: 1–64.
- 32 16. Zhang J, Gajjala S, Agrawal P, et al. Fully Automated Echocardiogram Interpretation in Clinical  
33 Practice. *Circulation* 2018; 138: 1623–1635.
- 34 17. Holste G, Oikonomou EK, Mortazavi B, et al. Self-supervised learning of echocardiogram videos  
35 enables data-efficient clinical diagnosis. *arXiv [cs.CV]*, <http://arxiv.org/abs/2207.11581> (2022).
- 36 18. Rajpurkar P, Irvin J, Zhu K, et al. CheXNet: Radiologist-Level Pneumonia Detection on Chest X-

- 1 Rays with Deep Learning. *arXiv [cs.CV]*, <http://arxiv.org/abs/1711.05225> (2017).
- 2 19. Gulshan V, Peng L, Coram M, et al. Development and Validation of a Deep Learning Algorithm for  
3 Detection of Diabetic Retinopathy in Retinal Fundus Photographs. *JAMA* 2016; 316: 2402–2410.
- 4 20. Jiao J, Droste R, Drukker L, et al. Self-Supervised Representation Learning for Ultrasound Video.  
5 *Proc IEEE Int Symp Biomed Imaging* 2020; 2020: 1847–1850.
- 6 21. Tran, Wang, Torresani, et al. A closer look at spatiotemporal convolutions for action recognition.  
7 *Proc Estonian Acad Sci Biol Ecol*,  
8 [http://openaccess.thecvf.com/content\\_cvpr\\_2018/html/Tran\\_A\\_Closer\\_Look\\_CVPR\\_2018\\_paper.ht](http://openaccess.thecvf.com/content_cvpr_2018/html/Tran_A_Closer_Look_CVPR_2018_paper.html)  
9 [ml](http://openaccess.thecvf.com/content_cvpr_2018/html/Tran_A_Closer_Look_CVPR_2018_paper.html) (2018).
- 10 22. Kingma DP, Ba J. Adam: A Method for Stochastic Optimization. *arXiv [cs.LG]*,  
11 <http://arxiv.org/abs/1412.6980> (2014).
- 12 23. Pedregosa, Varoquaux, Gramfort. Scikit-learn: Machine learning in Python. *the Journal of machine*,  
13 <https://www.jmlr.org/papers/volume12/pedregosa11a/pedregosa11a.pdf?ref=https://githubhelp.com>  
14 (2011).
- 15 24. Müller, Kornblith, Hinton. When does label smoothing help? *Adv Neural Inf Process Syst*,  
16 <https://proceedings.neurips.cc/paper/2019/hash/f1748d6b0fd9d439f71450117eba2725-Abstract.html>  
17 (2019).
- 18 25. Szegedy, Vanhoucke, Ioffe. Rethinking the inception architecture for computer vision. *Proc*  
19 *Estonian Acad Sci Biol Ecol*, [https://www.cv-](https://www.cv-foundation.org/openaccess/content_cvpr_2016/html/Szegedy_Rethinking_the_Inception_CVPR_2016_paper.html)  
20 [foundation.org/openaccess/content\\_cvpr\\_2016/html/Szegedy\\_Rethinking\\_the\\_Inception\\_CVPR\\_20](https://www.cv-foundation.org/openaccess/content_cvpr_2016/html/Szegedy_Rethinking_the_Inception_CVPR_2016_paper.html)  
21 [16\\_paper.html](https://www.cv-foundation.org/openaccess/content_cvpr_2016/html/Szegedy_Rethinking_the_Inception_CVPR_2016_paper.html) (2016).
- 22 26. Dietterich TG. Ensemble Methods in Machine Learning. In: *Multiple Classifier Systems*. Springer  
23 Berlin Heidelberg, 2000, pp. 1–15.
- 24 27. Saito T, Rehmsmeier M. The precision-recall plot is more informative than the ROC plot when  
25 evaluating binary classifiers on imbalanced datasets. *PLoS One* 2015; 10: e0118432.
- 26 28. Selvaraju RR, Cogswell M, Das A, et al. Grad-CAM: Visual Explanations from Deep Networks via  
27 Gradient-based Localization. *arXiv [cs.CV]*, <http://arxiv.org/abs/1610.02391> (2016).
- 28 29. Ghorbani A, Ouyang D, Abid A, et al. Deep learning interpretation of echocardiograms. *NPJ Digit*  
29 *Med* 2020; 3: 10.
- 30 30. Madani A, Arnaout R, Mofrad M, et al. Fast and accurate view classification of echocardiograms  
31 using deep learning. *NPJ Digit Med*; 1. Epub ahead of print March 21, 2018. DOI: 10.1038/s41746-  
32 017-0013-1.
- 33 31. Chiou Y-A, Hung C-L, Lin S-F. AI-assisted echocardiographic prescreening of heart failure with  
34 preserved ejection fraction on the basis of intrabeat dynamics. *JACC Cardiovasc Imaging* 2021; 14:  
35 2091–2104.
- 36 32. Arnaout R, Curran L, Zhao Y, et al. An ensemble of neural networks provides expert-level prenatal  
37 detection of complex congenital heart disease. *Nat Med* 2021; 27: 882–891.

- 1 33. Narang A, Bae R, Hong H, et al. Utility of a Deep-Learning Algorithm to Guide Novices to Acquire  
2 Echocardiograms for Limited Diagnostic Use. *JAMA Cardiol* 2021; 6: 624–632.
- 3 34. Voigt I, Boeckmann M, Bruder O, et al. A deep neural network using audio files for detection of  
4 aortic stenosis. *Clin Cardiol*. Epub ahead of print April 19, 2022. DOI: 10.1002/clc.23826.
- 5 35. Kwon J-M, Lee SY, Jeon K-H, et al. Deep learning-based algorithm for detecting aortic stenosis  
6 using electrocardiography. *J Am Heart Assoc* 2020; 9: e014717.
- 7 36. Cohen-Shelly M, Attia ZI, Friedman PA, et al. Electrocardiogram screening for aortic valve stenosis  
8 using artificial intelligence. *Eur Heart J* 2021; 42: 2885–2896.
- 9 37. Hata E, Seo C, Nakayama M, et al. Classification of Aortic Stenosis Using ECG by Deep Learning  
10 and its Analysis Using Grad-CAM. In: *2020 42nd Annual International Conference of the IEEE*  
11 *Engineering in Medicine & Biology Society (EMBC)*. 2020, pp. 1548–1551.
- 12 38. Yang C, Ojha BD, Aranoff ND, et al. Classification of aortic stenosis using conventional machine  
13 learning and deep learning methods based on multi-dimensional cardio-mechanical signals. *Sci Rep*  
14 2020; 10: 17521.
- 15 39. Ueda D, Yamamoto A, Ehara S, et al. Artificial intelligence-based detection of aortic stenosis from  
16 chest radiographs. *Eur Heart J Digit Health* 2022; 3: 20–28.
- 17 40. Sengupta PP, Shrestha S, Kagiya N, et al. A machine-learning framework to identify distinct  
18 phenotypes of aortic stenosis severity. *JACC Cardiovasc Imaging* 2021; 14: 1707–1720.
- 19 41. Huang Z, Long G, Wessler B, et al. A New Semi-supervised Learning Benchmark for Classifying  
20 View and Diagnosing Aortic Stenosis from Echocardiograms. In: Jung K, Yeung S, Sendak M, et al.  
21 (eds) *Proceedings of the 6th Machine Learning for Healthcare Conference*. PMLR, 06–07 Aug  
22 2021, pp. 614–647.
- 23 42. Pawade T, Clavel M-A, Tribouilloy C, et al. Computed Tomography Aortic Valve Calcium Scoring  
24 in Patients With Aortic Stenosis. *Circ Cardiovasc Imaging* 2018; 11: e007146.
- 25 43. Bonow RO, Greenland P. Population-wide trends in aortic stenosis incidence and outcomes.  
26 *Circulation* 2015; 131: 969–971.
- 27 44. Azizi S, Mustafa B, Ryan F, et al. Big self-supervised models advance medical image classification.  
28 In: *2021 IEEE/CVF International Conference on Computer Vision (ICCV)*. IEEE. Epub ahead of  
29 print October 2021. DOI: 10.1109/iccv48922.2021.00346.



## DISPLAY ITEMS

Table 1 | Table of baseline demographic and echocardiographic characteristics.

|                                                       |          | New England (Yale-New Haven Health System) |             |             |                                    |                             | California                         |
|-------------------------------------------------------|----------|--------------------------------------------|-------------|-------------|------------------------------------|-----------------------------|------------------------------------|
|                                                       |          | Missing                                    | Overall     | Derivation  | Geographically distinct testing #1 | Temporally distinct testing | Geographically distinct testing #2 |
| <b>n</b>                                              |          |                                            | 9089        | 6185        | 864                                | 2040                        | 5572                               |
| <b>Location</b>                                       |          |                                            | -           | YNHH        | BH, GH, LMH, WH                    | YNHH, BH, GH, LMH, WH       | CSMC                               |
| <b>Year of study</b>                                  |          |                                            | -           | 2016-2020   | 2016-2020                          | 2021                        | 2018-2019                          |
| <b>Age (years), mean (SD)</b>                         |          | 6                                          | 69.1 (16.0) | 69.9 (15.7) | 70.9 (16.3)                        | 65.7 (16.4)                 | 68.5 (17.1)                        |
| <b>Gender, n (%)</b>                                  | Female   | 0                                          | 4453 (49.0) | 2992 (48.4) | 464 (53.7)                         | 997 (48.9)                  | 2370 (42.5)                        |
|                                                       | Male     |                                            | 4636 (51.0) | 3193 (51.6) | 400 (46.3)                         | 1043 (51.1)                 | 3202 (57.5)                        |
| <b>Race &amp; Ethnicity (per echo reports), n (%)</b> | Asian    | 6770                                       | 32 (1.4)    | 21 (1.2)    | 2 (1.6)                            | 9 (2.0)                     | 404 (7.3)                          |
|                                                       | Black    |                                            | 268 (11.6)  | 188 (10.8)  | 16 (12.9)                          | 64 (14.2)                   | 651 (11.8)                         |
|                                                       | Hispanic |                                            | 118 (5.1)   | 84 (4.8)    | 10 (8.1)                           | 24 (5.3)                    | 556 (10.0)                         |
|                                                       | Other    |                                            | 37 (1.6)    | 27 (1.5)    | 4 (3.2)                            | 6 (1.3)                     | 451 (8.1)                          |
|                                                       | Unknown  |                                            | 18 (0.8)    | 12 (0.7)    | 2 (1.6)                            | 4 (0.9)                     | 101 (1.8)                          |
|                                                       | White    |                                            | 1846 (79.6) | 1411 (81.0) | 90 (72.6)                          | 345 (76.3)                  | 3409 (61.6)                        |
| <b>LVIDd Index (cm/m<sup>2</sup>), mean (SD)</b>      |          | 1111                                       | 2.4 (0.4)   | 2.4 (0.4)   | 2.4 (0.4)                          | 2.4 (0.4)                   | 2.4 (0.6)                          |
| <b>RVSP (mmHg), mean (SD)</b>                         |          | 2500                                       | 32.3 (13.5) | 32.5 (13.3) | 35.7 (16.5)                        | 29.8 (12.0)                 | 32.8 (14.4)                        |
| <b>EF (%), mean (SD)</b>                              |          | 108                                        | 59.4 (10.8) | 59.5 (10.8) | 58.5 (12.0)                        | 59.1 (10.2)                 | 57.8 (14.8)                        |
| <b>AVA by VTI (cm<sup>2</sup>), mean (SD)</b>         |          | 4713                                       | 1.4 (0.8)   | 1.3 (0.8)   | 1.5 (0.9)                          | 2.1 (0.9)                   | 1.4 (1.2)                          |
| <b>AV mean gradient (mmHg), mean (SD)</b>             |          | 3649                                       | 20.5 (17.8) | 23.2 (18.2) | 18.4 (17.2)                        | 9.0 (9.4)                   | 23.8 (19.8)                        |
| <b>AV peak velocity (m/s), mean (SD)</b>              |          | 441                                        | 2.2 (1.2)   | 2.4 (1.3)   | 2.2 (1.2)                          | 1.6 (0.6)                   | 2.3 (1.4)                          |

AV: aortic valve; BH: Bridgeport hospital; BP: blood pressure; CSMC: Cedars-Sinai Medical Center; EF: ejection fraction; GH: Greenwich hospital; LAD: left atrium; LMH: Lawrence & Memorial hospital; LVIDd: left ventricular internal diastolic diameter; RVSP: right ventricular systolic pressure; SD: standard deviation; VTI: velocity time integral, WH: Westerly hospital; YNHH: Yale-New Haven Hospital.

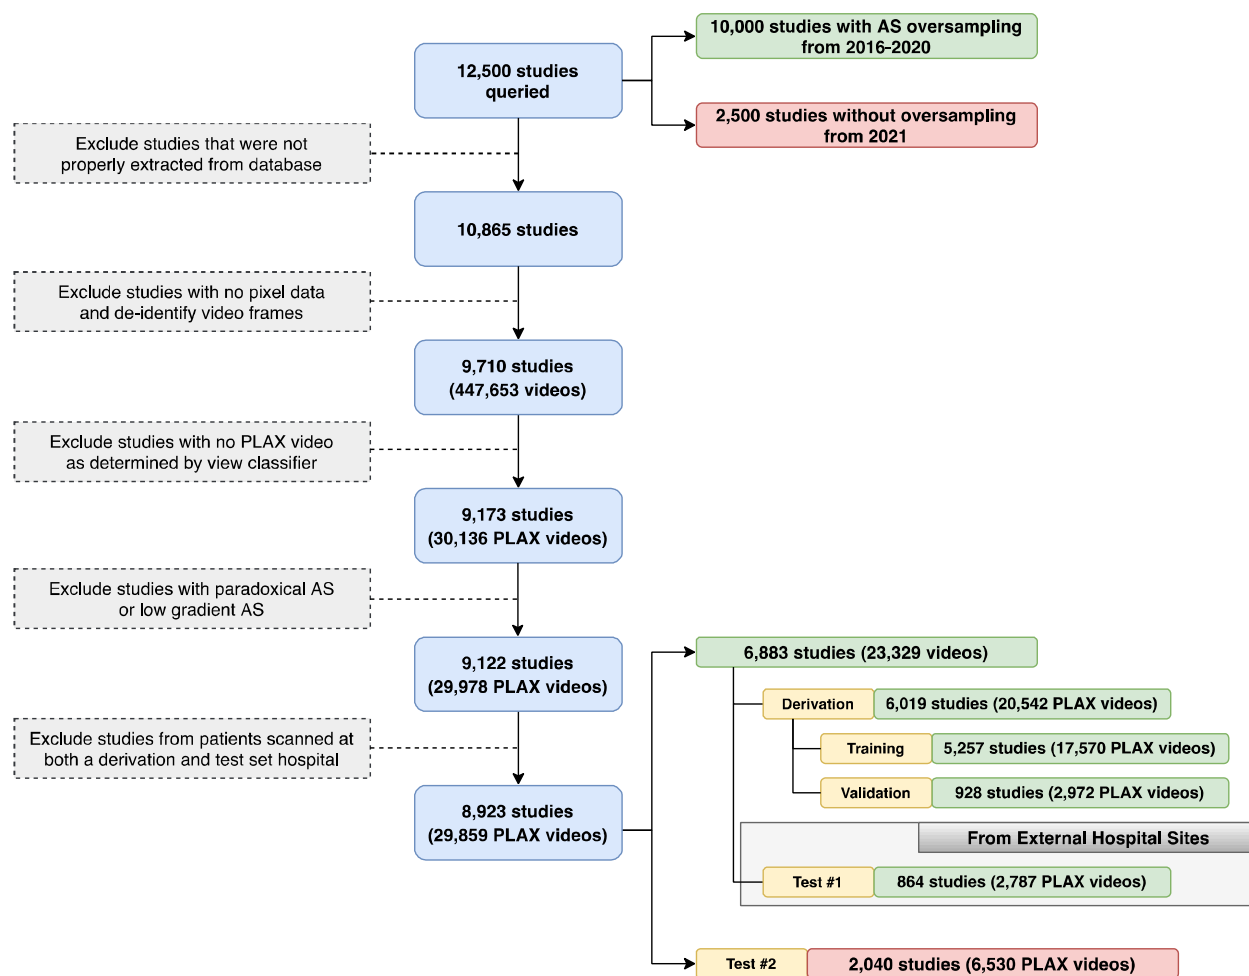

**Figure 1 | Inclusion-exclusion flowchart for the New England study population.** Exclusion criteria for transthoracic echocardiogram (TTE) studies and videos included in this study from the Yale-New Haven Health network. Studies with valid pixel data were de-identified frame by frame, and the parasternal long axis (PLAX) view was determined by an automated view classifier. A sample of 10,000 studies from 2016-2020 (with AS oversampled) were split into a derivation set and external test set, which comprised studies from hospital sites not encountered during model training. An independent random sample of 2,500 studies from 2021 (with no oversampling) was used as an additional test set to evaluate robustness to temporal shift.

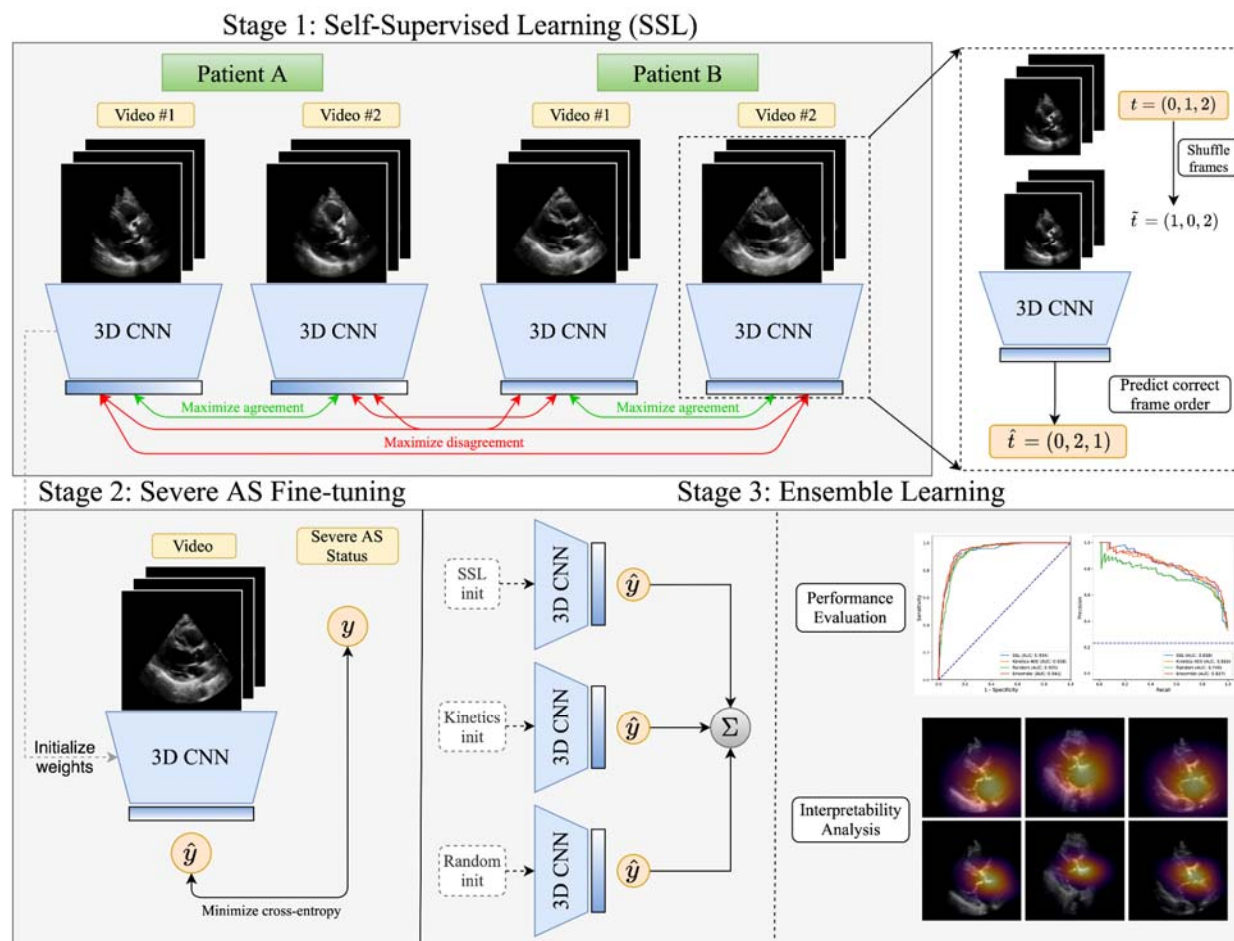

**Figure 2 | Overview of proposed approach.** We first perform self-supervised pretraining on parasternal long axis (PLAX) echocardiogram videos, selecting different PLAX videos from the same patient as “positive samples” for contrastive learning. After this representation learning step, we then use these learned weights as the initialization for a model that is fine-tuned to predict severe aortic stenosis (AS) in a supervised fashion.

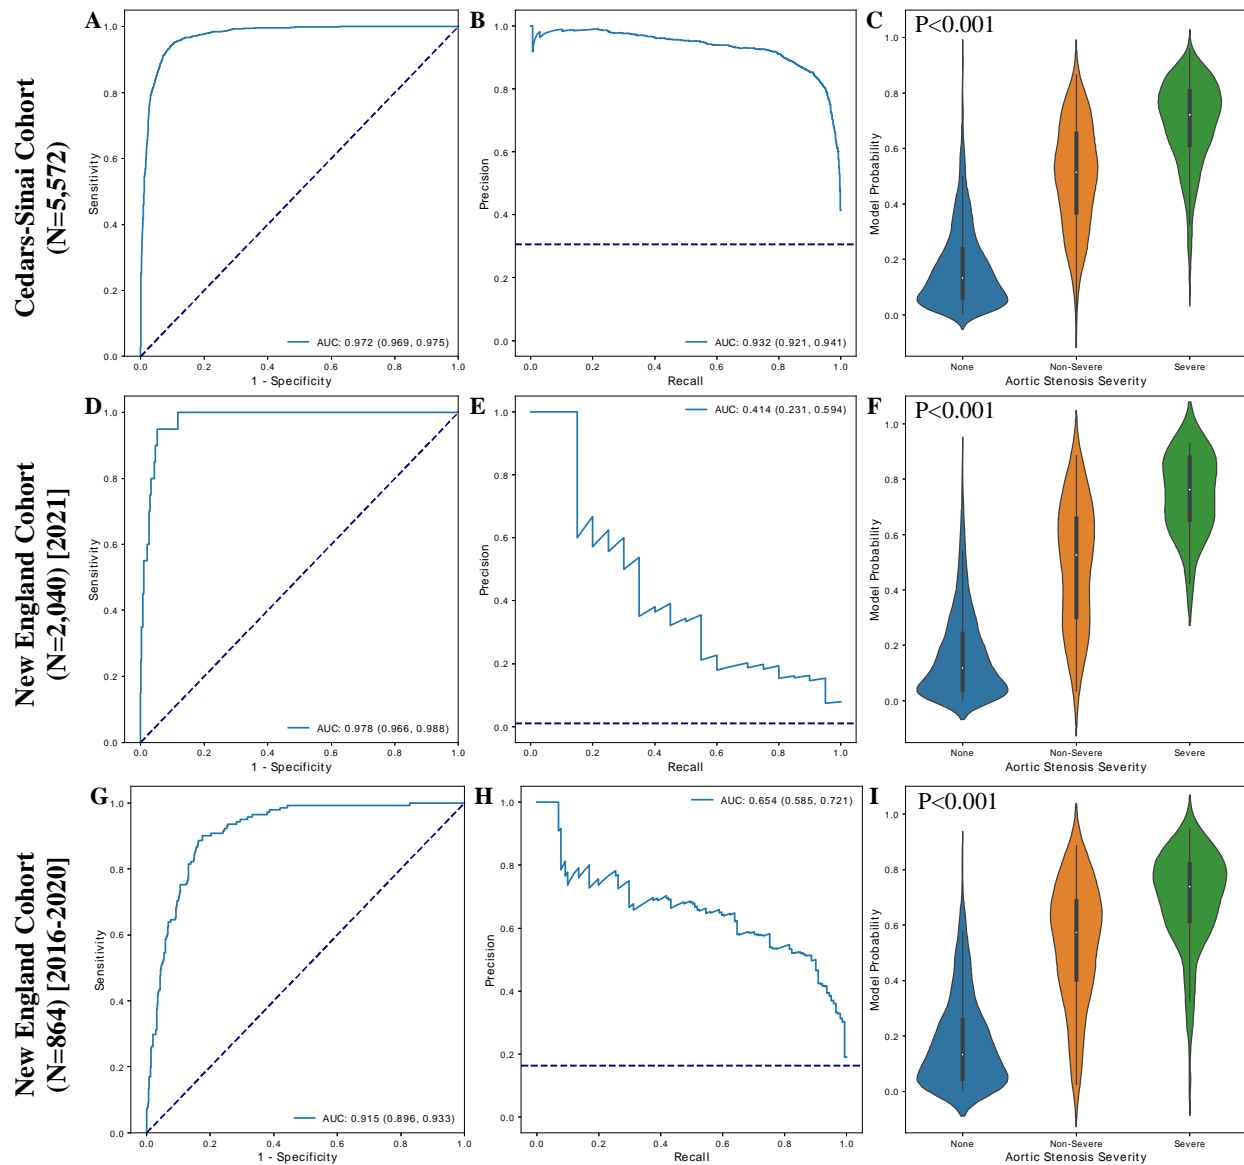

**Figure 3 | Model performance in the external validation sets.** Receiver operating characteristic curves (first column), precision-recall curves (second column), and violin plots showing relationship of model output with aortic stenosis severity (third column) for the external Cedars-Sinai cohort (first row), temporally distinct New England cohort (second row), and external New England cohort (third row).

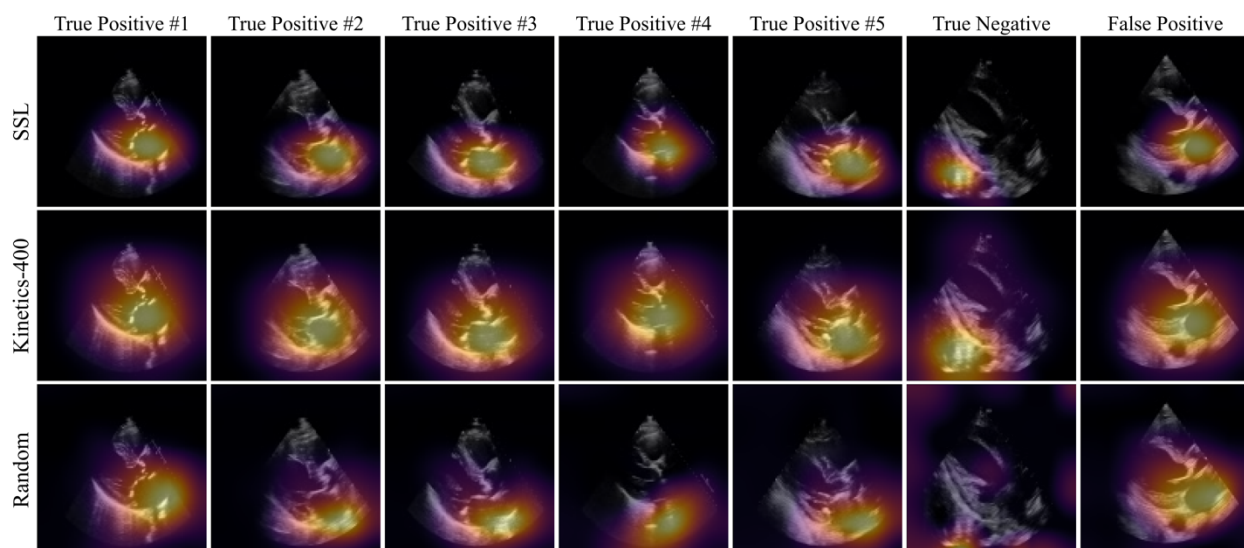

**Figure 4 | Saliency map visualization.** Spatial attention maps for the randomly initialized model (top row), Kinetics-pretrained model (middle row) and self-supervised learning (SSL) approach (bottom row) for five true positives (first five columns), a true negative (sixth column), and a false positive (last column). As determined by the Kinetics-pretrained model, the first five columns represent the five most confident severe AS predictions, the sixth column represents the most confident “normal” (no severe AS) prediction, and the seventh column represents the most confident *incorrect* severe AS prediction. Saliency maps were computed with the GradCAM method and reduced to a single 2D heatmap by maximum intensity projection along the temporal axis.

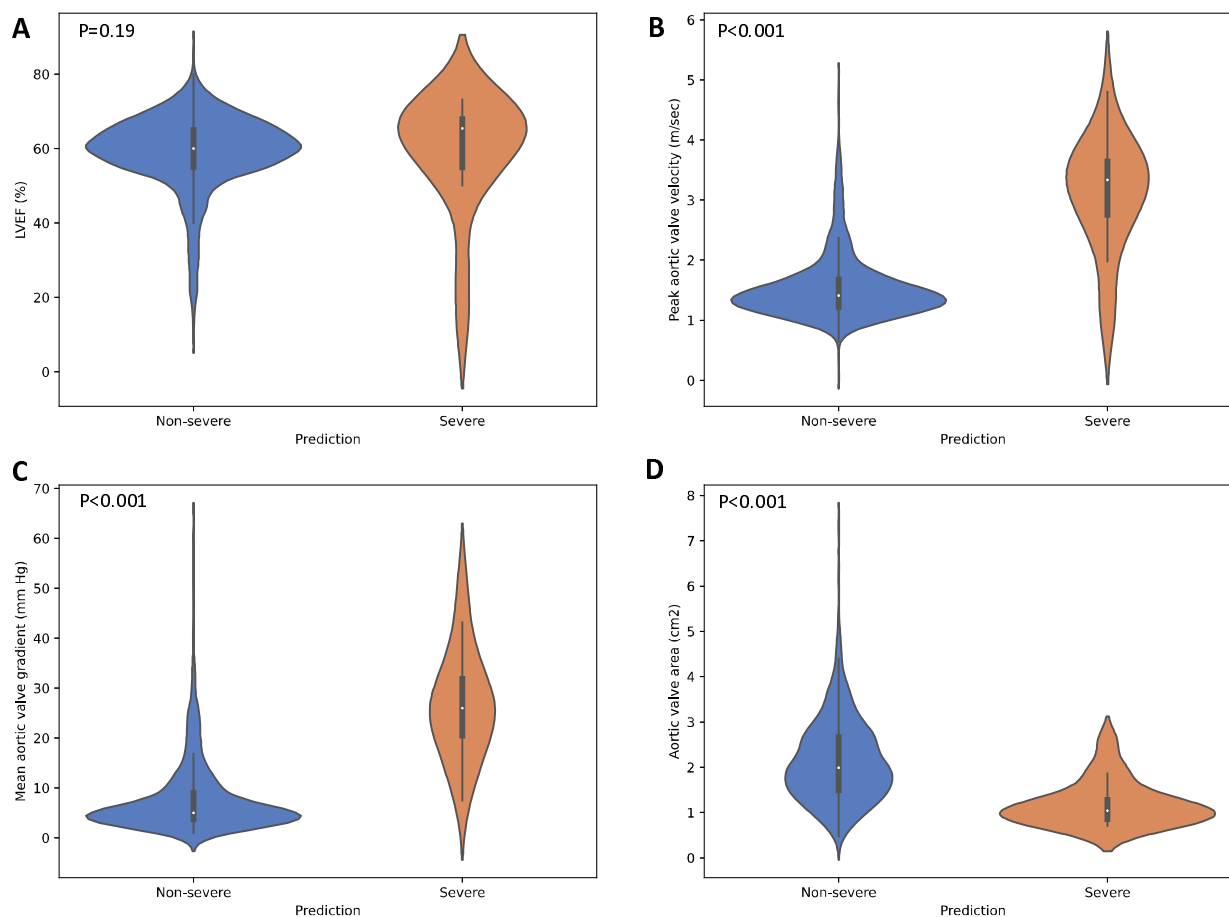

**Figure 5 | Comparison between model predictions and echocardiographic left ventricular and aortic valve assessment among patients without severe aortic stenosis.** Violin plots demonstrating the distribution of LVEF (left ventricular ejection fraction, **A**) peak aortic valve velocity (**B**), mean aortic valve gradient (**C**) and mean aortic valve area (**D**) for patients without severe AS, stratified based on the predicted class based on the final ensemble model. These results are based on the temporally distinct cohort of patients scanned in 2021, without oversampling for severe aortic stenosis cases.
